# Supplementary material
Source: PubMed Central journal article supplement (PMC6877758)
Supplement: borfigurescompiled_ioz130.pdf [file borfigurescompiled_ioz130.pdf]

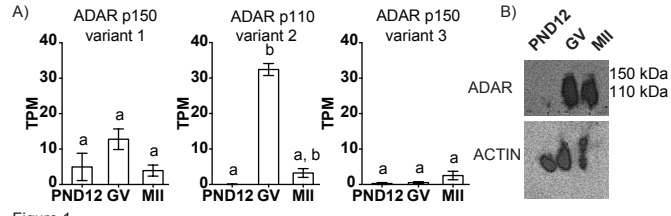

Figure 1.

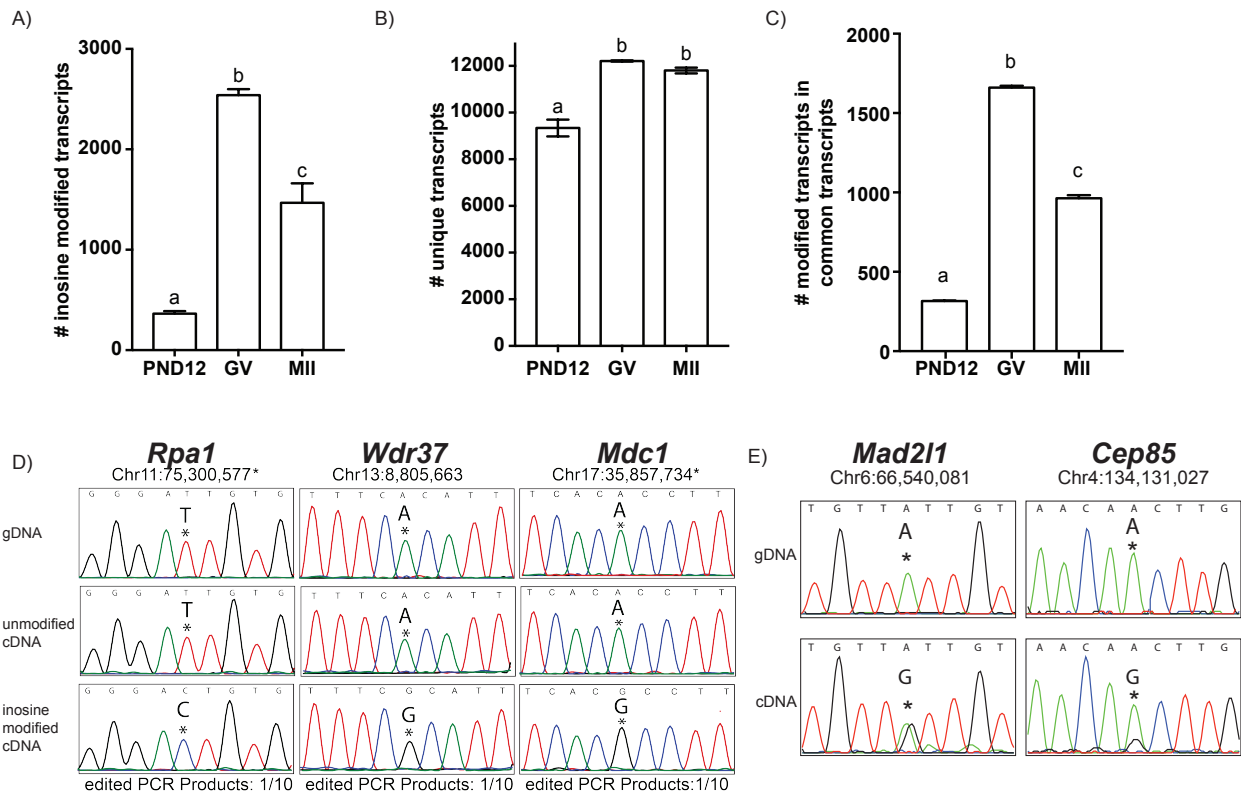

Figure 2.

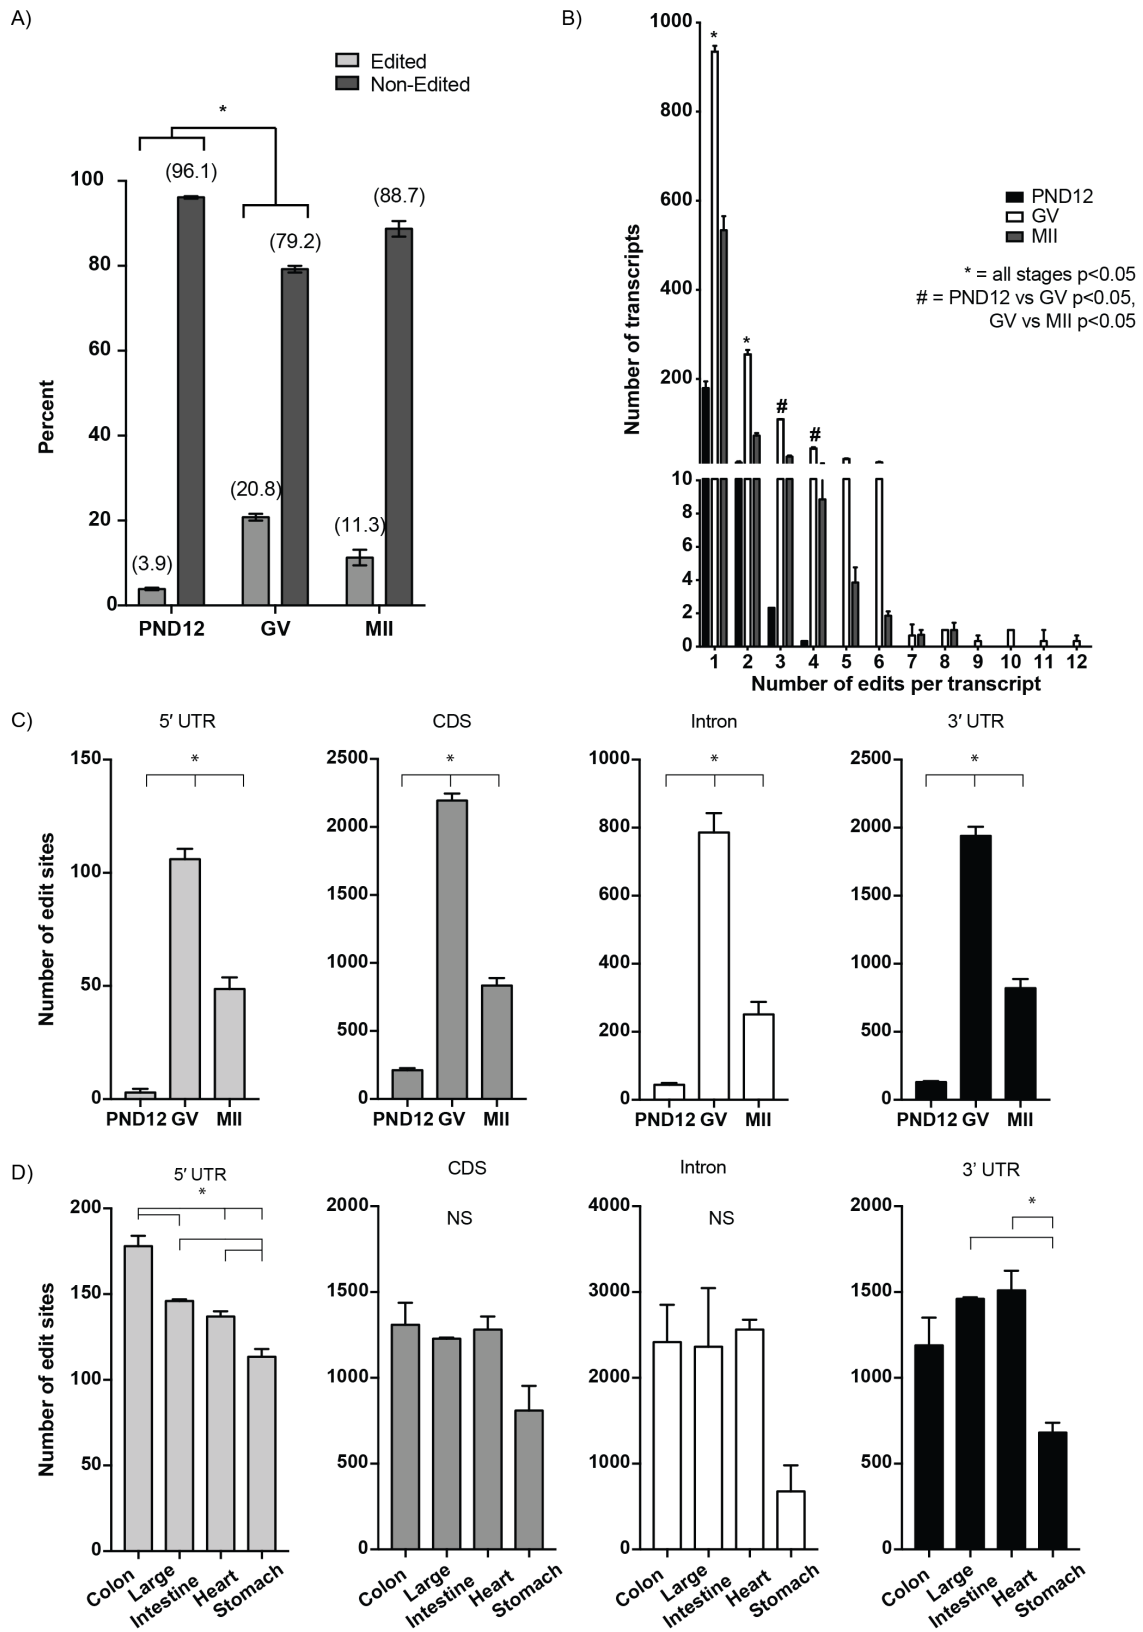

Figure 3.

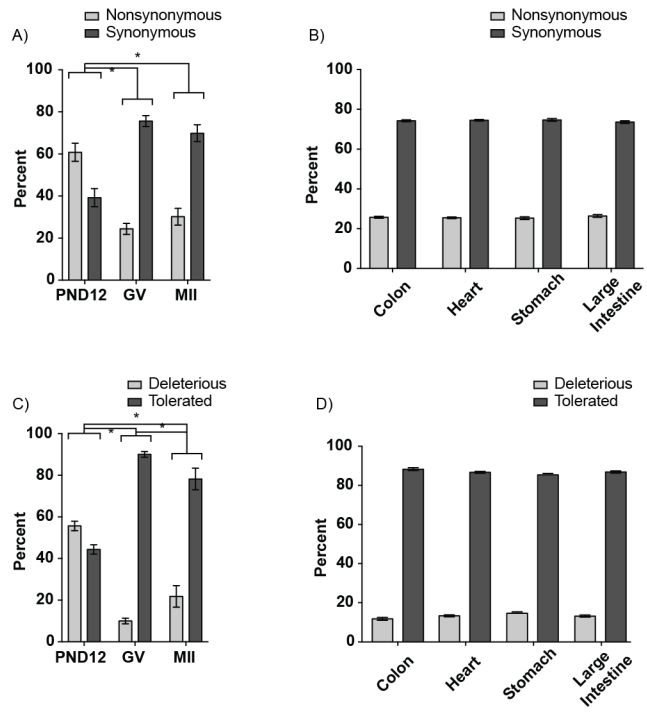

Figure 4.

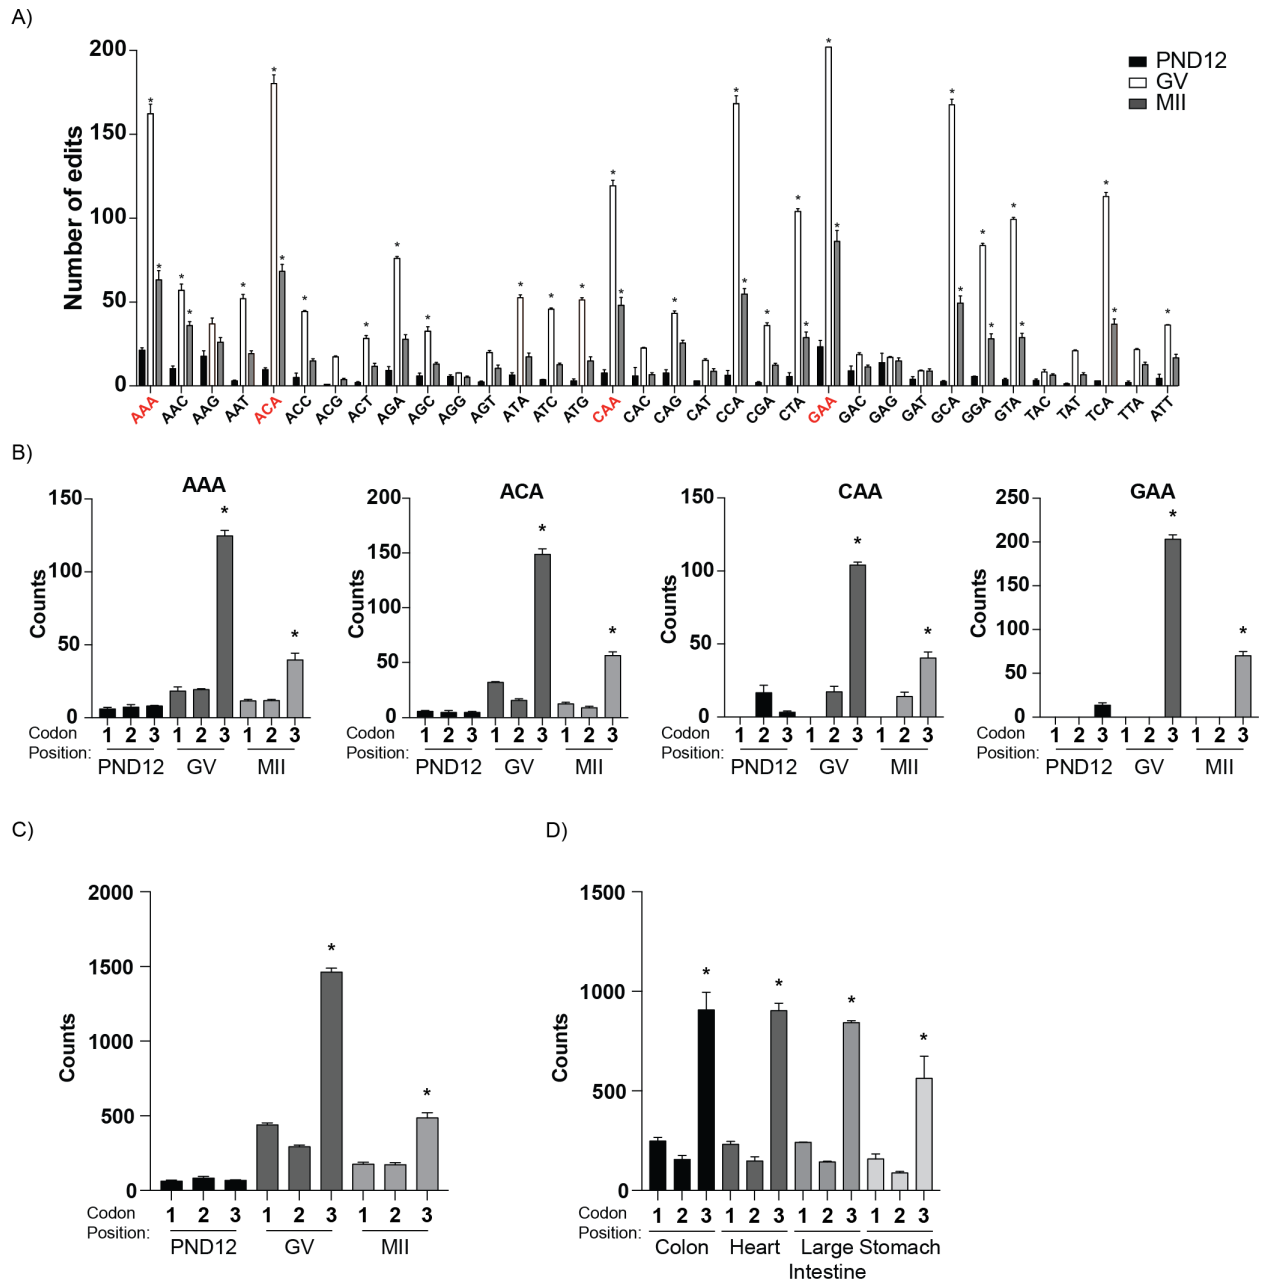

Figure 5.

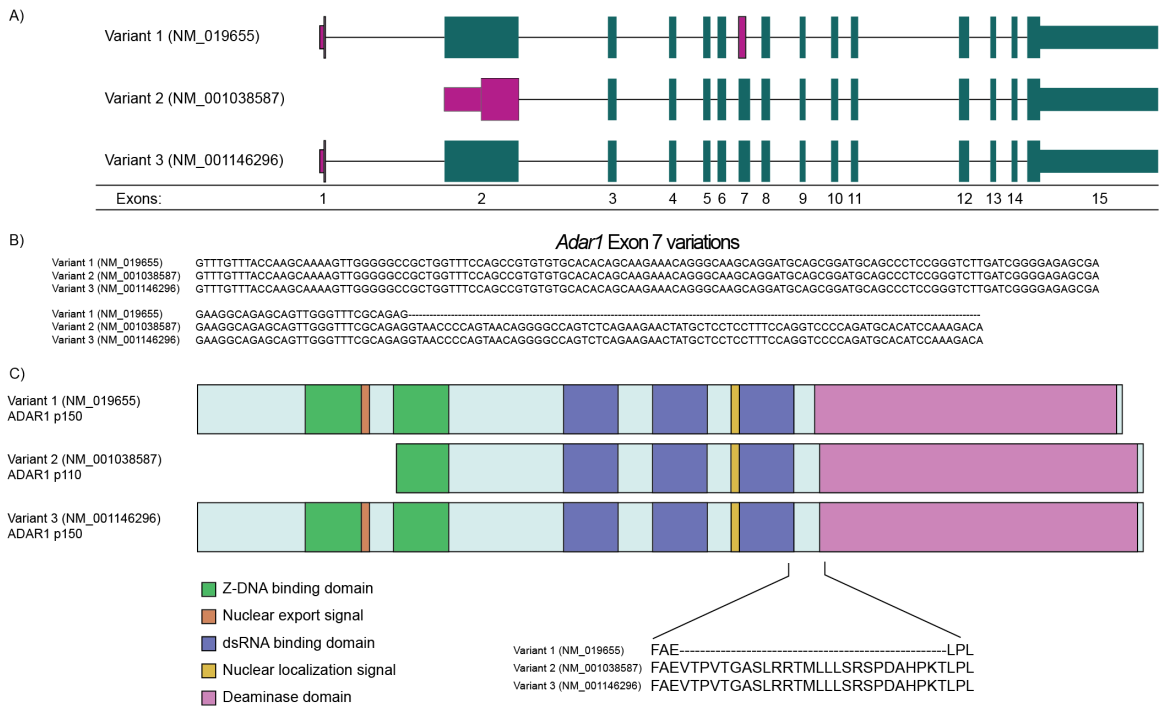

**Fig. S1.** Schematic diagrams showing ADAR1 variants. A) *Adar* transcript variants are labeled according to NCBI Reference Sequence. Variants 1 and 3 generate the longest mRNA isoforms, containing 15 exons. Variant 1, however, has a truncated exon 7 that is the result of alternative splicing. Variant 2 utilizes an alternative promoter and alternative start codon in exon 2. B) Exon 7 sequences of the three *Adar* variants detailing the truncated region of variant 1. C) Protein domains of ADAR1 variants. Variant 1 encodes a 26 amino acids shorter protein than variant 3; those amino acids reside between the dsRNA binding domain and deaminase domain.

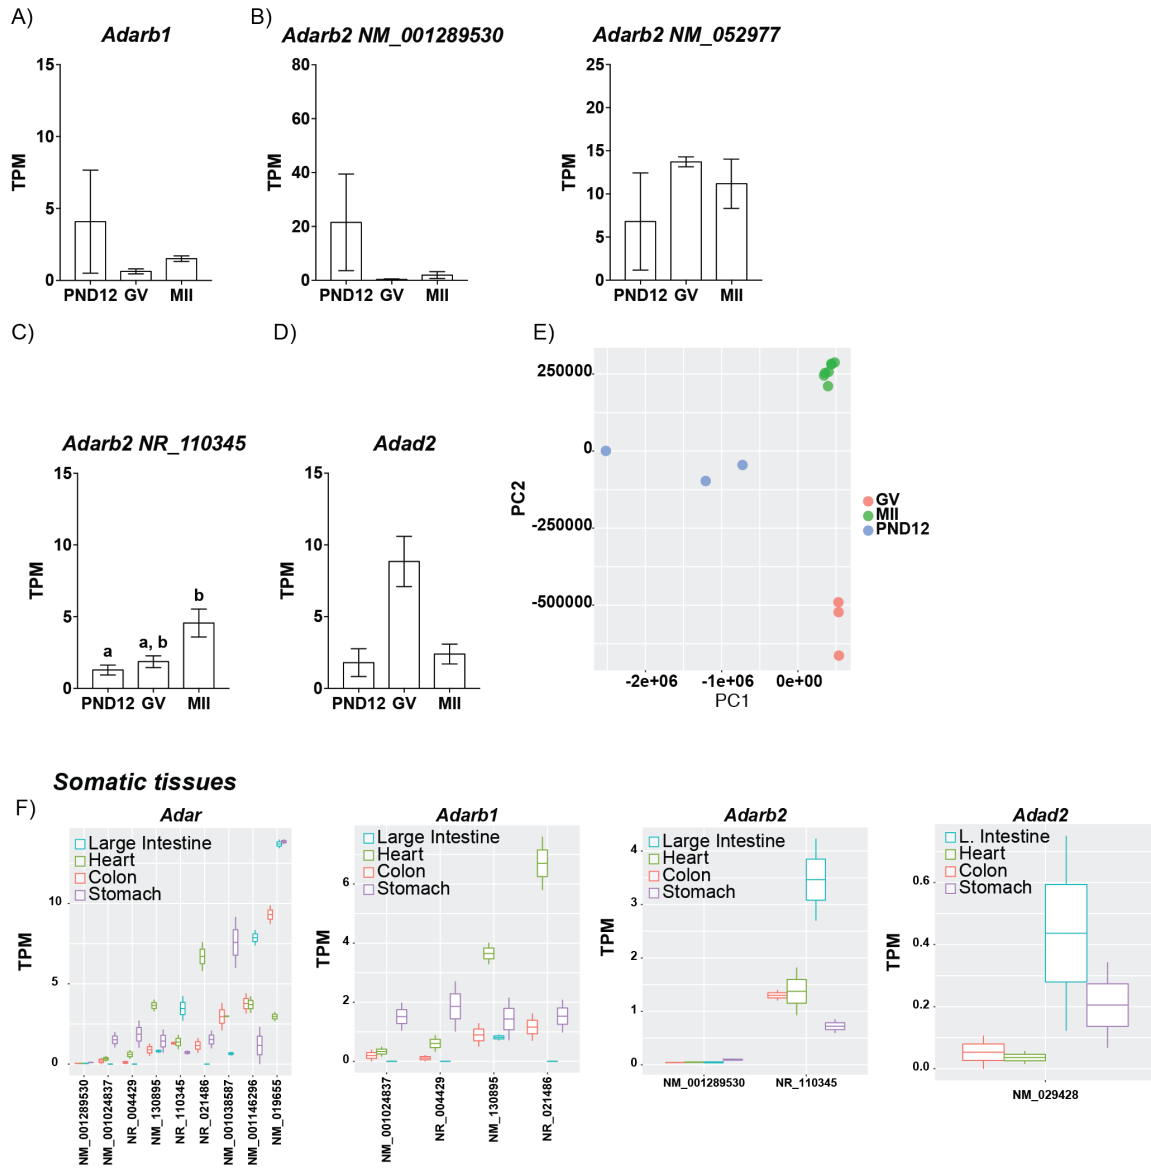

**Fig. S2.** Other adenosine deaminase genes expression levels in mouse oocytes and eggs. Adarb1 (A), Adarb2 (B-C), and Adad2 (D) isoform abundance in PND12 oocytes, GV oocytes, and MII eggs. E) Principal components analysis on RNA-seq datasets that were utilized in our studies. Expression of adenosine deaminase genes in somatic tissues (F). TPM: transcripts per million. a,b Means  $\pm$  SEM within a panel that have different superscripts were different ( $p < 0.05$ ); Kruskal-Wallis test.

A) Adult brain

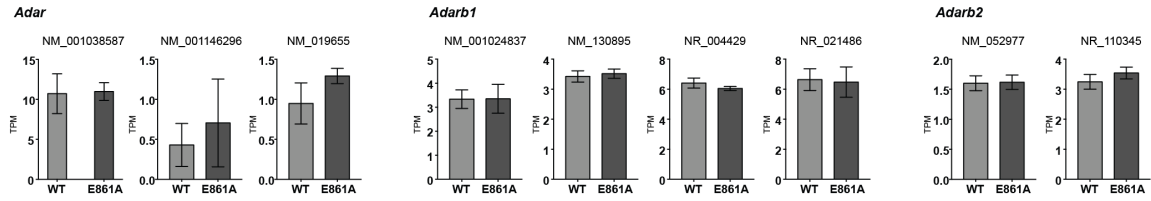

B)

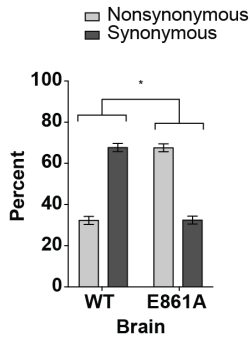

C)

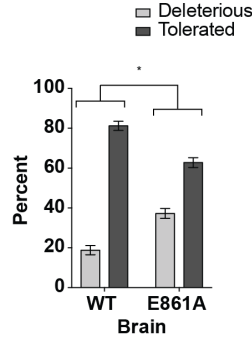

D)

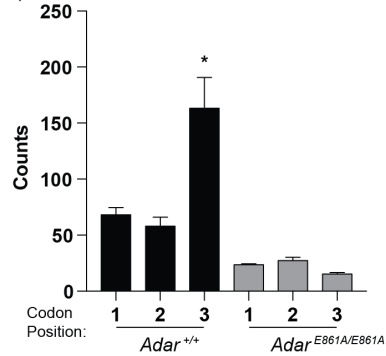

**Fig. S3.** Levels of individual adenosine deaminase family member transcript levels in WT (*Adar*<sup>+/+</sup>) and *Adar*<sup>E861A/E861A</sup> adult brain tissues (A). *Adad1* was undetected in all tissues examined. TPM: transcripts per million. B-D) Consequence of inosine RNA modifications and location of inosines within codons of *Adar*<sup>+/+</sup> and *Adar*<sup>E861A/E861A</sup> adult brain tissue.



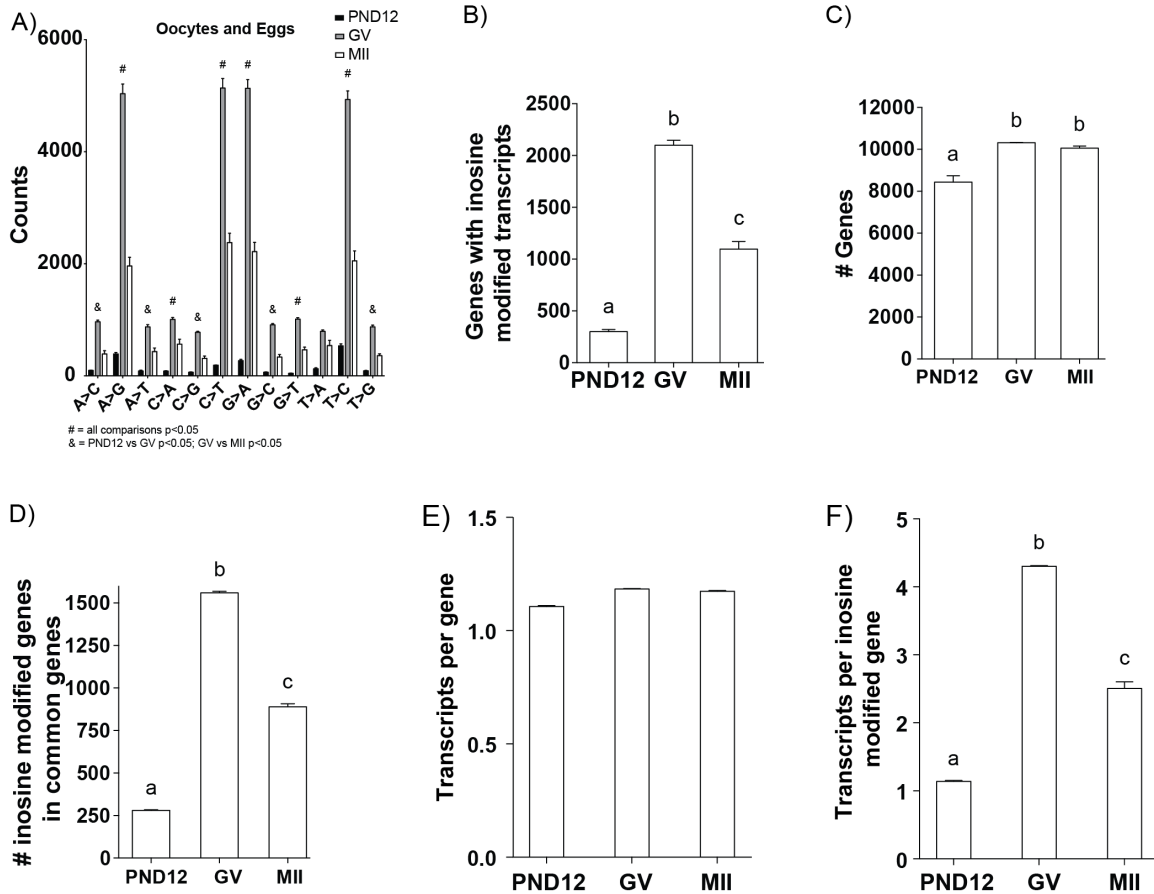

**Fig. S4.** The number of genes with inosine RNA modifications within PND12 oocytes, GV oocytes, and MII eggs. A) Single nucleotide substitution counts identified by our RNA modification discovery pipeline in PND12 oocytes, GV oocytes, and MII eggs in the 5' UTR, CDS, intron, and 3' UTR. B) Total number of genes with inosines, TPM  $\geq$  1. C) Number of genes detected, TPM  $\geq$  1. D) Number of genes with inosine modifications among genes in common among samples, TPM  $\geq$  1. E) Number of transcripts per gene detected in PND12 oocytes, GV oocytes, and MII eggs. F) Number of transcripts per inosine modified gene in PND12 oocytes, GV oocytes, and MII eggs.

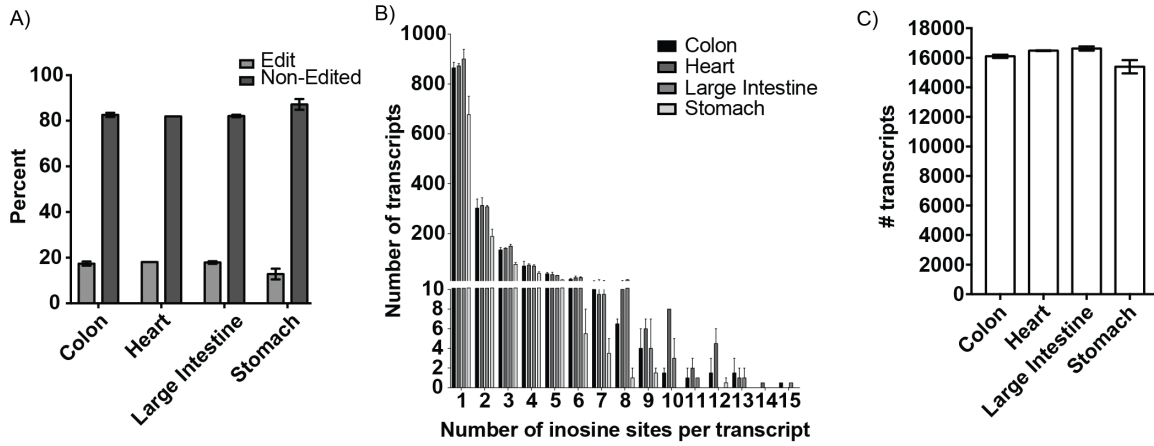

**Fig. S5.** Patterns of inosine RNA modifications in somatic cells. A) Proportion of the transcriptome that contains inosine modification sites within colon, heart, large intestine, and stomach. B) Counts of inosine modified transcripts exhibiting one or multiple inosine sites per transcript in somatic tissues. C) Total number of unique mRNA transcripts per sample. Only transcripts with TPM  $\geq 1$  were analyzed.

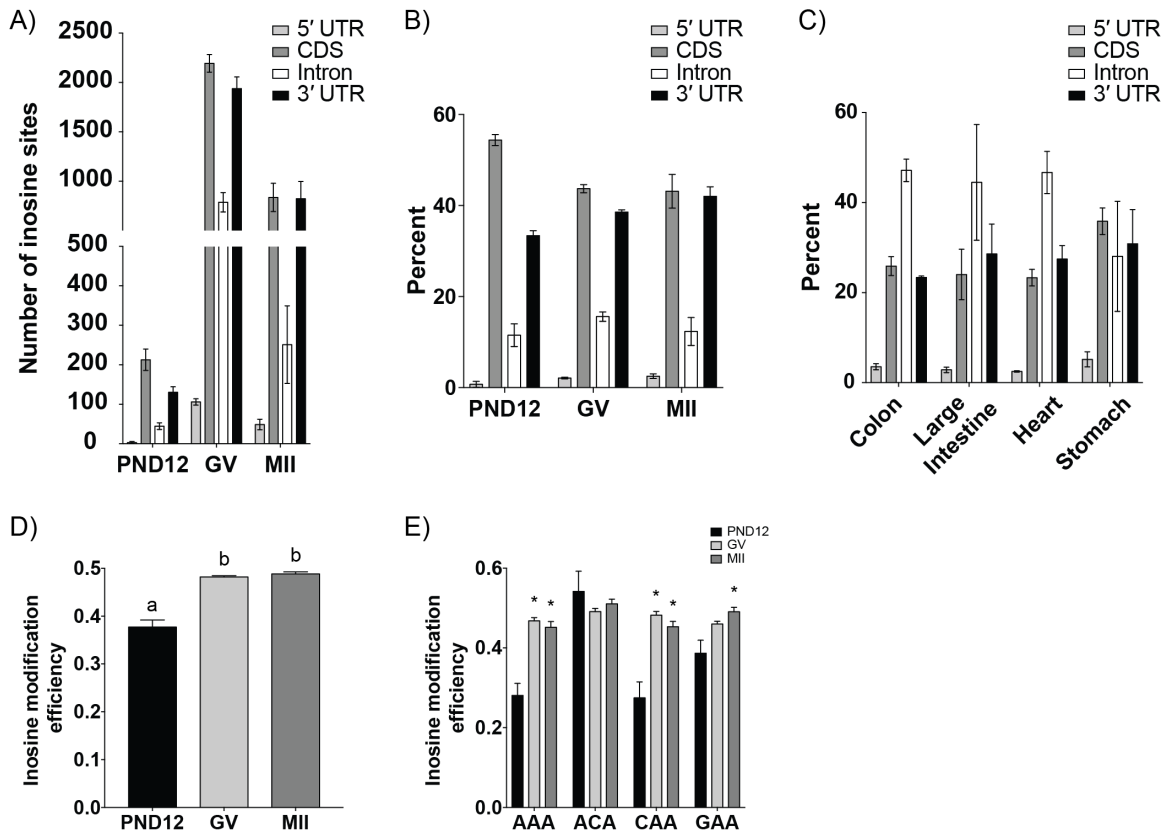

**Fig. S6.** Distribution of inosine RNA modifications in oocyte and egg samples. Total number (A) and total percent (B-C) of inosine RNA modifications within specific regions (5' UTR, CDS, intron, and 3' UTR) in mRNA of oocytes and eggs, and somatic tissues of C57BL/6 wild-type mice. D) Transcriptome-wide inosine RNA modification efficiency at the third codon position in oocyte samples. E) Inosine RNA modification efficiency at the four codons with highest enrichment for wobble position inosine modifications. a,b Means  $\pm$  SEM within a panel that have different superscripts were different ( $p < 0.05$ ); significance was determined using one-way ANOVA, followed by Tukey's multiple comparison tests. Means  $\pm$  SEM within a panel that have superscripts \* were different ( $p < 0.05$ ); significance was determined using two-way ANOVA tests. Only codons from transcripts with TPM  $\geq 1$  were analyzed.

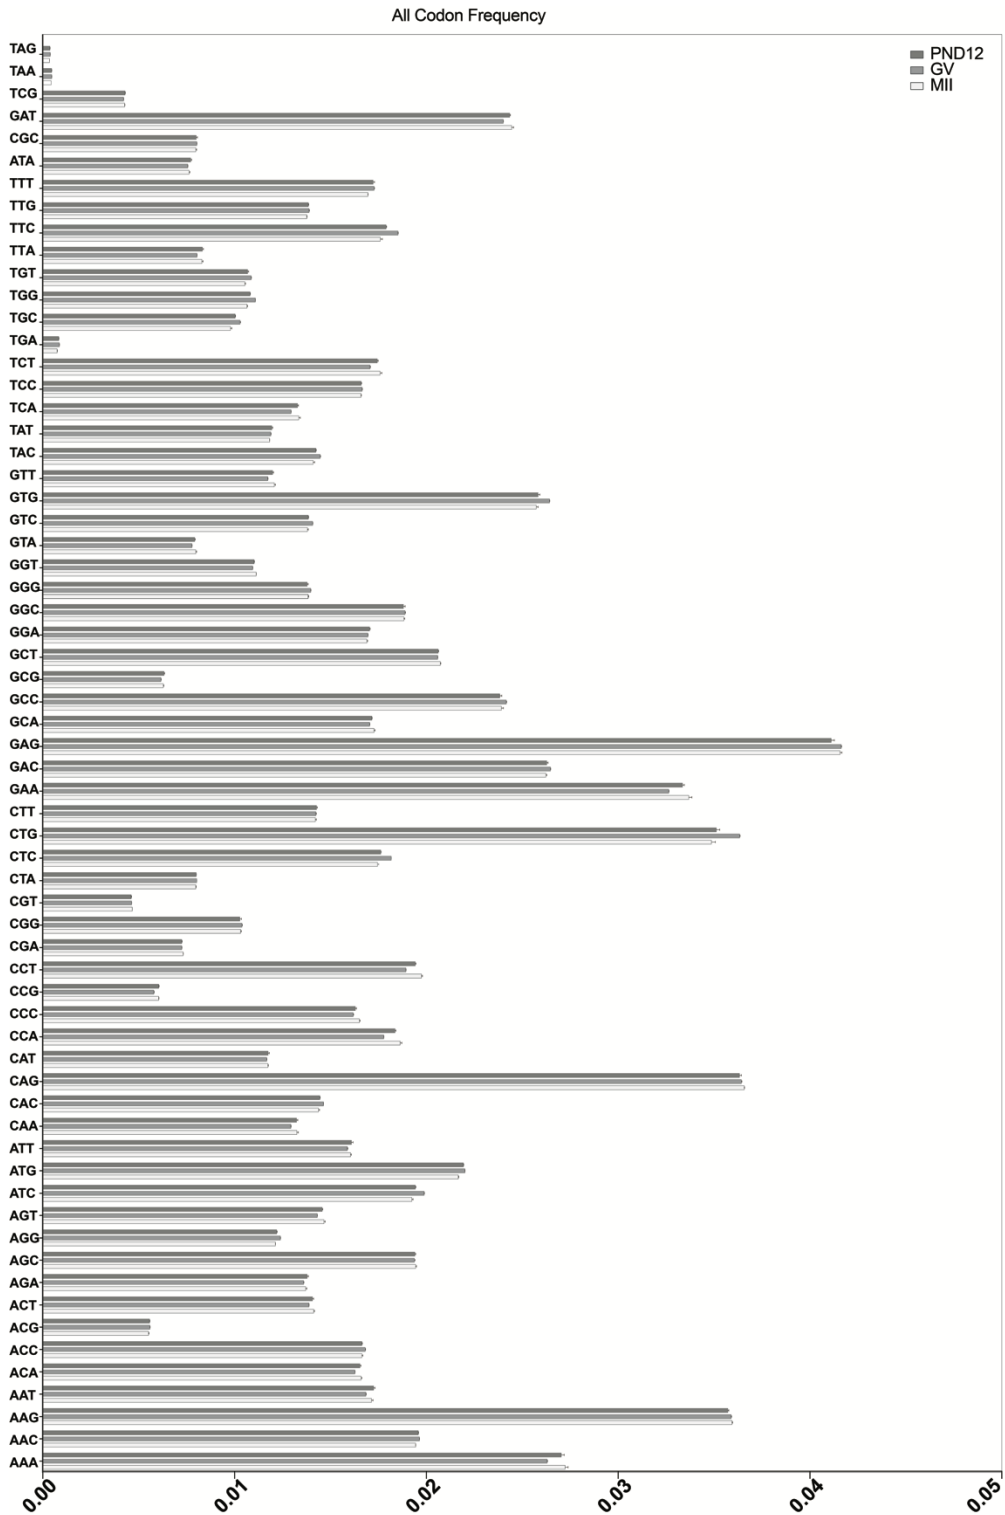

**Fig. S7.** Codon usage in PND12 oocytes, GV oocytes, and MII eggs. The frequency of codons occurring in all transcripts with a TPM  $\geq 1$ .

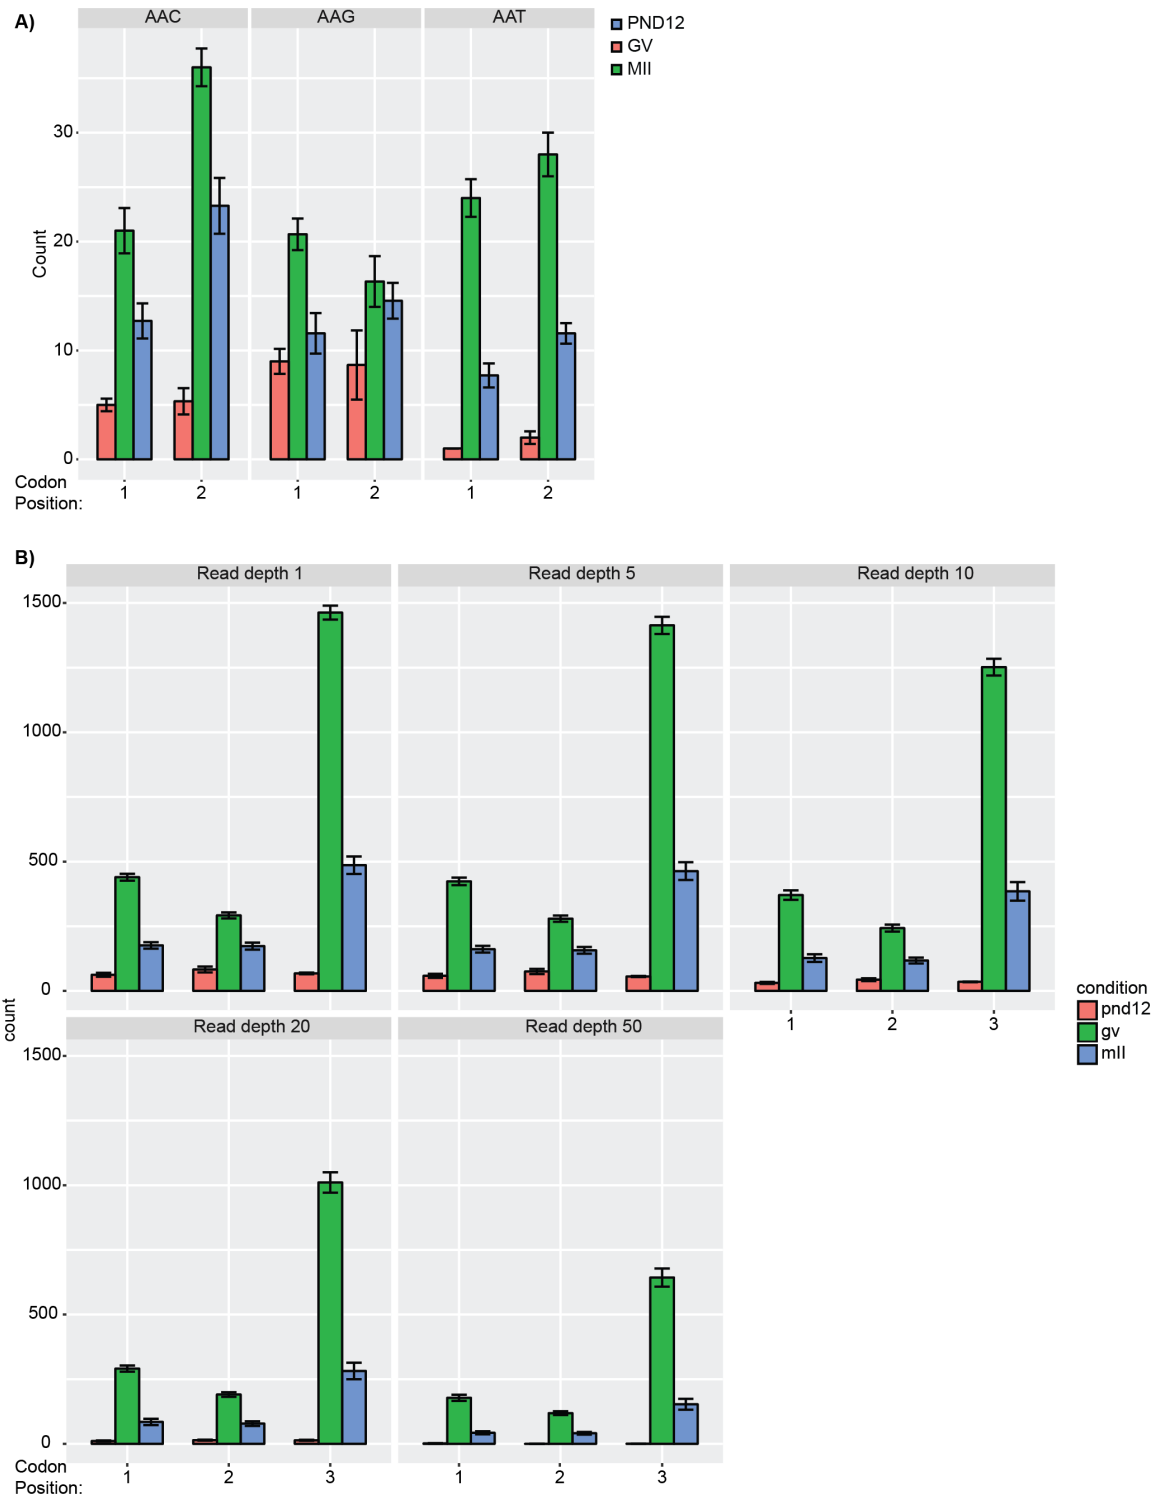

**Fig. S8.** A) Global frequency of inosine sites occurring at the first, second, or third codon position in PND12, GV, and MII samples within codons with adenosines occurring in the first two codon positions. B) Global frequency of inosine sites occurring at the first, second, or third codon position in PND12, GV, and MII samples at various read depths (number of reads covering an inosine site).

**Table S1. Synonymous substitutions validated in the RADAR database. The validated substitutions occur at the third position of the codon in all cases when multiple adenosines are present.**

| Chromosome Position | Gene             | Amino Acid | Nucleotide Sequence | Reference            |
|---------------------|------------------|------------|---------------------|----------------------|
| chr12:72,063,017    | <i>Actr10</i>    | Ala>Ala    | GCA>GCG             | Gu et al. 2012       |
| chr15:38,421,368    | <i>Azin1</i>     | Glu>Glu    | GAA>GAG             | Gu et al. 2012       |
| chr16:91,656,315    | <i>Son</i>       | Ser>Ser    | TCA>TCG             | Danecek et al 2012   |
| chr16:91,656,378    | <i>Son</i>       | Leu>Leu    | TTA>TTG             | Danecek et al 2012   |
| chr16:91,656,471    | <i>Son</i>       | Leu>Leu    | CTA>CTG             | Danecek et al 2012   |
| chr19:43,515,804    | <i>Cnnm1</i>     | Gln>Gln    | CAA>CAG             | Danecek et al 2012   |
| chr3:32,460,407     | <i>Mfn1</i>      | Ala>Ala    | GCA>GCG             | Danecek et al 2012   |
| chr3:96,024,186     | <i>Hist2h2ab</i> | Leu>Leu    | TTA>TTG             | Cattenoz et al. 2013 |
| chr8:109,409,504    | uc009ngo.1       | Leu>Leu    | CTA>CTG             | Gu et al. 2012       |

**Table S2. RNA-seq alignment statistics for samples used.**

| <b>Adult Brain ADAR E861A</b>                        |                     |                      |                      |                    |                    |                    |
|------------------------------------------------------|---------------------|----------------------|----------------------|--------------------|--------------------|--------------------|
| Name                                                 | SRR5223114          | SRR5223115           | SRR5223116           | SRR5223117         | SRR5223118         | SRR5223119         |
| # Reads                                              | 81245663            | 91095314             | 74985821             | 94478063           | 94284943           | 92826293           |
| # paired reads                                       | 81245663 (100.00%)  | 91095314 (100.00%)   | 74985821 (100.00%)   | 94478063 (100.00%) | 94284943 (100.00%) | 92826293 (100.00%) |
| # aligned concordantly 0 time                        | 11625083 (14.31%)   | 12905847 (14.17%)    | 11068350 (14.76%)    | 13329461 (14.11%)  | 15242188 (16.17%)  | 13728329 (14.79%)  |
| # aligned concordantly exactly 1 time                | 64134835 (78.94%)   | 71641901 (78.64%)    | 59061846 (78.76%)    | 74891906 (79.27%)  | 71943133 (76.30%)  | 72709092 (78.33%)  |
| # aligned concordantly >1 times                      | 5485745 (6.75%)     | 6547566 (7.19%)      | 4855625 (6.48%)      | 6256696 (6.62%)    | 7099622 (7.53%)    | 6388872 (6.88%)    |
| # pairs aligned concordantly 1 times                 | 11625083            | 12905847             | 11068350             | 13329461           | 15242188           | 13728329           |
| # aligned discordantly 1 time                        | 113693 (0.98%)      | 119921 (0.93%)       | 85844 (0.78%)        | 130000 (0.98%)     | 120422 (0.79%)     | 133755 (0.97%)     |
| # pairs aligned 0 times concordantly or discordantly | 11511390            | 12785926             | 10982506             | 13199461           | 15121766           | 13594574           |
| # mates make up the pairs                            | 23022780            | 25571852             | 21965012             | 26398922           | 30243532           | 27189148           |
| # aligned 0 times                                    | 19617312 (85.21%)   | 21936133 (85.78%)    | 18814406 (85.66%)    | 22403143 (84.86%)  | 26223922 (86.71%)  | 23200759 (85.33%)  |
| # aligned exactly 1 time                             | 2865353 (12.45%)    | 3121684 (12.21%)     | 2680245 (12.20%)     | 3358645 (12.72%)   | 3297205 (10.90%)   | 3350699 (12.32%)   |
| # aligned >1 times                                   | 540115 (2.35%)      | 514035 (2.01%)       | 470361 (2.14%)       | 637134 (2.41%)     | 722405 (2.39%)     | 637690 (2.35%)     |
| overall alignment rate                               | 87.93%              | 87.96%               | 87.45%               | 88.14%             | 86.09%             | 87.50%             |
| <b>GV</b>                                            |                     |                      |                      |                    |                    |                    |
| Name                                                 | SRR1986034          | SRR1986035           | SRR1986036           |                    |                    |                    |
| # Reads                                              | 19398267            | 15032360             | 18001213             |                    |                    |                    |
| # paired reads                                       | 19398267 (100.00%)  | 15032360 (100.00%)   | 18001213 (100.00%)   |                    |                    |                    |
| # aligned concordantly 0 time                        | 1048012 (5.40%)     | 1188986 (7.91%)      | 1004962 (5.58%)      |                    |                    |                    |
| # aligned concordantly exactly 1 time                | 15759846 (81.24%)   | 11679622 (77.70%)    | 14674412 (81.52%)    |                    |                    |                    |
| # aligned concordantly >1 times                      | 2590409 (13.35%)    | 2163752 (14.39%)     | 2321839 (12.90%)     |                    |                    |                    |
| # pairs aligned concordantly 1 times                 | 1048012             | 1188986              | 1004962              |                    |                    |                    |
| # aligned discordantly 1 time                        | 37514 (3.58%)       | 88753 (7.46%)        | 47306 (4.71%)        |                    |                    |                    |
| # pairs aligned 0 times concordantly or discordantly | 1010498             | 1100233              | 957656               |                    |                    |                    |
| # mates make up the pairs                            | 2020996             | 2200466              | 1915312              |                    |                    |                    |
| # aligned 0 times                                    | 1488461 (73.65%)    | 1466337 (66.64%)     | 1363330 (71.18%)     |                    |                    |                    |
| # aligned exactly 1 time                             | 350911 (17.36%)     | 503802 (22.90%)      | 367151 (19.17%)      |                    |                    |                    |
| # aligned >1 times                                   | 181624 (8.99%)      | 230327 (10.47%)      | 184831 (9.65%)       |                    |                    |                    |
| overall alignment rate                               | 96.16%              | 95.12%               | 96.21%               |                    |                    |                    |
| <b>MII</b>                                           |                     |                      |                      |                    |                    |                    |
| Name                                                 | SRR2878525          | SRR2048236           | SRR2878527           | SRR2048236         | SRR2048237         | SRR2048238         |
| # Reads                                              | 19476338            | 5199427              | 24546728             | 5199427            | 4779221            | 5637428            |
| # paired reads                                       | 19476338 (100.00%)  | 5199427 (100.00%)    | 24546728 (100.00%)   | 5199427 (100.00%)  | 4779221 (100.00%)  | 5637428 (100.00%)  |
| # aligned concordantly 0 time                        | 8273947 (42.48%)    | 1704872 (32.79%)     | 9238046 (37.63%)     | 1704872 (32.79%)   | 805759 (16.86%)    | 58473 (17.00%)     |
| # aligned concordantly exactly 1 time                | 10424248 (53.52%)   | 3279806 (63.08%)     | 14217528 (57.92%)    | 3279806 (63.08%)   | 3754696 (78.56%)   | 4421294 (78.43%)   |
| # aligned concordantly >1 times                      | 778143 (4.00%)      | 214749 (4.13%)       | 1091154 (4.45%)      | 214749 (4.13%)     | 218766 (4.58%)     | 257661 (4.57%)     |
| # pairs aligned concordantly 0 times                 | 8273947             | 1704872              | 9238046              | 1704872            | 805759             | 958473             |
| # aligned discordantly 1 time                        | 979797 (11.84%)     | 47529 (2.79%)        | 1329727 (14.39%)     | 47529 (2.79%)      | 67646 (8.40%)      | 80820 (8.43%)      |
| # pairs aligned 0 times concordantly or discordantly | 7294150             | 1657343              | 7908319              | 1657343            | 738113             | 877653             |
| # mates make up the pairs                            | 14588300            | 3314686              | 15816638             | 3314686            | 1476226            | 1755306            |
| # aligned 0 times                                    | 7448569 (51.06%)    | 2285813 (68.96%)     | 8028167 (50.76%)     | 2285813 (68.96%)   | 1043334 (70.68%)   | 1228030 (69.96%)   |
| # aligned exactly 1 time                             | 5557838 (38.10%)    | 929112 (28.03%)      | 6478867 (40.96%)     | 929112 (28.03%)    | 386841 (26.20%)    | 468827 (26.71%)    |
| # aligned >1 times                                   | 1581893 (10.84%)    | 99761 (3.01%)        | 1309604 (8.28%)      | 99761 (3.01%)      | 46051 (3.12%)      | 58449 (3.33%)      |
| overall alignment rate                               | 80.88%              | 78.02%               | 83.65%               | 78.02%             | 89.08%             | 89.11%             |
| <b>PND12</b>                                         |                     |                      |                      |                    |                    |                    |
| Name                                                 | 9pbCNTL1_SRR6749400 | 10pbCNTL2_SRR6749401 | 11pbCNTL3_SRR6749399 |                    |                    |                    |
| # Reads                                              | 14903618            | 12908435             | 11208327             |                    |                    |                    |
| # unpaired                                           | 14903618 (100.00%)  | 12908435 (100.00%)   | 11208327 (100.00%)   |                    |                    |                    |
| # aligned 0 times                                    | 2981562 (20.01%)    | 2570856 (19.92%)     | 2305865 (20.57%)     |                    |                    |                    |
| # aligned exactly 1 time                             | 9397666 (63.06%)    | 8470318 (65.62%)     | 7313920 (65.25%)     |                    |                    |                    |
| # aligned >1 times                                   | 2524390 (16.94%)    | 1867261 (14.47%)     | 1588542 (14.17%)     |                    |                    |                    |
| overall alignment rate                               | 79.99%              | 80.08%               | 79.43%               |                    |                    |                    |
